# Supplementary material for: Behavioral and transcriptomic effects of the cancer treatment tamoxifen in mice
Source: Front Neurosci. 2023 Feb 10;17:1068334. doi: 10.3389/fnins.2023.1068334 (PMC9951777; doi:10.3389/fnins.2023.1068334)
Supplement: Supplementary file 1 [file Table_1.XLSX]

## Sheet: Data
TAM/Control	Symbol	q value	log2 FC
Down	Igfbpl1	3.59e-19	-3.01012
Down	Rarres2	6.91e-19	-1.27571
Down	Rsph1	6.37e-18	-1.43776
Down	Hydin	2.61e-16	-1.7177
Down	Foxj1	2.61e-16	-1.62099
Down	Prelp	6.66e-16	-0.960391
Down	Cfap65	2.87e-15	-1.39762
Down	Cfap91	3.14e-15	-1.66276
Down	Pltp	9.13e-15	-0.821671
Down	Tmem98	1.08e-14	-1.24167
Down	Crocc2	8.39e-14	-2.0244
Down	Efs	1.51e-13	-0.827107
Down	Ak7	2.2e-13	-1.9683
Down	Dnaaf3	2.77e-13	-1.82713
Down	Lrrc23	4.32e-13	-1.62302
Down	Ucp2	4.93e-13	-1.36585
Down	Odad1	4.93e-13	-1.13254
Down	Cd82	4.93e-13	-1.0375
Down	Cd9	1.88e-12	-0.659014
Down	Nxn	2.5e-12	-1.02028
Down	Mycbpap	3.94e-12	-1.89365
Down	Ubxn10	1.84e-11	-1.58182
Down	Dnah12	2e-11	-2.01476
Down	Ccdc162	5.89e-11	-1.3613
Down	Fxyd1	1.73e-10	-0.938893
Down	Csrp2	2.45e-10	-1.17024
Down	Cdhr3	2.81e-10	-1.66374
Down	Trf	3.42e-10	-0.688555
Down	Tbc1d2	3.87e-10	-1.0389
Down	Shroom3	3.89e-10	-1.07696
Down	Atp7a	6.32e-10	-0.927036
Down	Rsph4a	7.36e-10	-1.10334
Down	Ppp1r14a	1.12e-09	-0.63715
Down	Otx2os1	1.39e-09	-3.42422
Down	Cfap43	1.39e-09	-1.42644
Down	Car14	1.39e-09	-1.39989
Down	Ezr	1.39e-09	-0.790611
Down	Cfap161	1.4e-09	-1.58431
Down	Ntn4	1.47e-09	-0.741475
Down	Eomes	1.57e-09	-4.29736
Down	Cfap61	1.57e-09	-1.27031
Down	Ephx1	1.57e-09	-0.775798
Down	Tcn2	1.78e-09	-1.17484
Down	Prkcq	1.78e-09	-0.875399
Down	Fam47e	1.84e-09	-2.26125
Down	Prrg4	1.96e-09	-1.544
Down	Slc25a13	1.96e-09	-1.19596
Up	9330121K16Rik	2.17e-09	0.689867
Down	Spaca9	2.39e-09	-2.98327
Down	Dnai2	2.87e-09	-1.22902
Down	Ttc12	3.53e-09	-1.20201
Down	Vwa5b1	4.1e-09	-1.73585
Down	Fam167a	4.35e-09	-1.18982
Down	1700007K13Rik	4.36e-09	-1.33372
Down	Cd63	4.36e-09	-0.663687
Down	Scube3	6.97e-09	-1.24346
Down	Slc37a2	9.29e-09	-1.63343
Down	Cfap57	1.07e-08	-1.47274
Down	Vamp8	1.21e-08	-1.22459
Down	Pnp2	1.22e-08	-1.47646
Down	Plin3	1.27e-08	-0.766742
Down	Tsnaxip1	1.32e-08	-1.74781
Down	2410004P03Rik	1.44e-08	-1.51582
Down	Dnah10	1.44e-08	-1.41501
Down	Ccdc170	1.47e-08	-2.14843
Down	Ccdc187	1.49e-08	-1.76112
Down	Tinagl1	1.69e-08	-1.14359
Down	Dlec1	1.69e-08	-1.05063
Down	Mlf1	2.23e-08	-1.97451
Down	Odad2	2.28e-08	-1.9977
Down	Cfap44	2.43e-08	-0.996852
Down	Tjp3	2.59e-08	-1.84266
Down	C3	3.39e-08	-2.23066
Down	Ltc4s	3.47e-08	-1.3856
Down	Dnai1	3.51e-08	-0.825482
Down	Cox6b2	4.31e-08	-1.36584
Down	Odad4	4.31e-08	-1.25741
Down	Sod3	4.76e-08	-0.876233
Down	Slc12a4	5.77e-08	-0.776762
Down	Gsn	6.1e-08	-0.586363
Down	Syne3	6.19e-08	-1.0362
Down	Plekhg3	6.61e-08	-0.717186
Down	Stk36	6.67e-08	-0.864423
Down	Nek5	8.79e-08	-2.15744
Down	Spint2	1.09e-07	-0.816004
Down	Hemk1	1.09e-07	-0.615219
Down	Cfap206	1.15e-07	-1.92558
Down	Cdhr4	1.21e-07	-1.37611
Down	Col5a3	1.32e-07	-0.780862
Down	Stra6	1.6e-07	-0.955645
Down	Ccdc180	1.67e-07	-2.08051
Down	Chdh	1.7e-07	-0.868537
Down	Lbhd2	1.71e-07	-4.64287
Down	Slc12a2	1.84e-07	-0.763532
Down	Ltbp3	1.84e-07	-0.740624
Down	Niban2	1.97e-07	-0.586506
Down	Agtrap	2.52e-07	-0.651461
Down	Dnah1	2.52e-07	-0.604319
Down	F11r	2.68e-07	-0.936727
Down	Neat1	2.91e-07	-0.642214
Down	A2m	3.06e-07	-2.7594
Down	Ccdc153	3.1e-07	-1.36656
Down	Aass	3.19e-07	-0.685257
Down	Rbp1	3.56e-07	-1.24348
Down	Arsg	3.56e-07	-0.813632
Down	Ccdc113	3.61e-07	-1.18162
Down	Dnaaf1	3.62e-07	-2.33794
Down	Lrrc36	3.7e-07	-1.8974
Down	Iqcd	3.82e-07	-1.13584
Down	Pdlim2	3.87e-07	-0.639823
Down	Adgrv1	4.06e-07	-1.34466
Down	Trp73	4.5e-07	-0.993167
Down	Rd3	4.84e-07	-2.61592
Down	Cd59a	5.25e-07	-1.47234
Down	Hfe	5.45e-07	-0.985571
Down	Lrrc74b	5.75e-07	-1.91411
Down	Erich2	6.24e-07	-1.63731
Down	Acss3	6.3e-07	-1.50746
Down	Tppp3	6.86e-07	-0.880987
Down	Odf3b	7.11e-07	-1.08716
Down	Nid2	8.91e-07	-1.36791
Down	Dock5	9.63e-07	-0.804484
Down	Gm19935	1.08e-06	-1.5714
Down	Sh3d19	1.12e-06	-0.783434
Down	Iqub	1.16e-06	-1.57631
Down	Col4a3	1.21e-06	-2.31111
Down	Kif9	1.28e-06	-0.879712
Down	Mmp15	1.28e-06	-0.760848
Down	Mc3r	1.68e-06	-2.84699
Down	Frmpd2	1.68e-06	-1.22346
Down	Sowahc	1.94e-06	-0.860709
Down	Efemp2	2.11e-06	-0.746117
Down	Col17a1	2.19e-06	-2.71433
Down	Eps8l2	2.5e-06	-1.50262
Down	Cfap54	2.57e-06	-0.752083
Down	Tmem212	2.66e-06	-1.52607
Down	Nt5dc2	2.69e-06	-0.667156
Down	Llgl2	2.74e-06	-1.33812
Down	Kif27	2.81e-06	-0.972085
Down	Bcar3	2.99e-06	-0.612846
Down	Ccdc102a	3.28e-06	-1.13029
Down	Sqor	3.33e-06	-0.723315
Down	Serpinh1	3.49e-06	-0.781338
Down	Arhgef16	3.85e-06	-1.7023
Down	Col4a4	4.15e-06	-2.10885
Down	Flvcr2	4.15e-06	-0.941145
Down	Tuft1	4.27e-06	-0.769111
Down	Lrrc43	4.33e-06	-1.57905
Down	Sgms2	4.71e-06	-1.44026
Down	Itgb4	4.71e-06	-0.74006
Down	Serpinb1b	4.85e-06	-2.21003
Down	Gm16090	4.9e-06	-2.91185
Down	Cpq	5.08e-06	-0.744337
Down	Map3k19	5.08e-06	-0.633301
Down	Lrrc1	5.31e-06	-0.627206
Down	Tgtp1	5.79e-06	-1.69657
Down	Map3k15	5.79e-06	-1.13913
Down	Acaa2	6.09e-06	-0.719193
Down	Cdh26	6.33e-06	-2.8432
Down	Frem1	6.54e-06	-1.29164
Down	Nqo1	6.56e-06	-0.843329
Down	Mpp7	6.75e-06	-0.982679
Down	BC034090	7.23e-06	-0.787645
Down	Cldn3	7.44e-06	-1.74905
Down	Tmem237	7.85e-06	-0.620211
Down	Scara5	8.29e-06	-2.16952
Down	3300002A11Rik	8.74e-06	-1.865
Down	Rab20	8.82e-06	-2.36925
Down	Dnah3	8.9e-06	-1.56485
Down	Nek11	1e-05	-1.03671
Down	Ttc16	1.02e-05	-1.41507
Down	Cd24a	1.05e-05	-0.643563
Down	Pm20d1	1.07e-05	-0.891122
Down	Ppfibp2	1.07e-05	-0.737393
Down	Htr2c	1.08e-05	-0.758212
Down	Ttll6	1.1e-05	-1.94512
Down	Zic3	1.1e-05	-1.67156
Down	Cdr2	1.11e-05	-1.46133
Down	Pdgfd	1.12e-05	-0.79047
Down	Serhl	1.12e-05	-0.733626
Down	Eno4	1.12e-05	-0.68711
Down	Baiap2l1	1.14e-05	-1.9243
Down	Cfap97d2	1.15e-05	-1.09693
Down	Aldh3b1	1.19e-05	-0.675576
Down	Cldn11	1.2e-05	-0.613439
Down	Gpx8	1.22e-05	-1.4417
Down	Slc4a2	1.28e-05	-1.40807
Down	Tspo	1.3e-05	-0.911185
Down	Musk	1.31e-05	-1.39566
Down	Acacb	1.31e-05	-1.0968
Down	Myo7a	1.31e-05	-0.596256
Down	Ldlrap1	1.34e-05	-0.794189
Down	Dnai4	1.37e-05	-0.618173
Down	Mgst1	1.4e-05	-0.73169
Down	Chrnb4	1.45e-05	-2.03356
Down	1110017D15Rik	1.46e-05	-0.921287
Down	Mobp	1.59e-05	-0.651349
Down	Carns1	1.61e-05	-0.693648
Down	Mns1	1.72e-05	-0.963642
Down	Emb	1.76e-05	-0.815005
Down	Dynlrb2	1.89e-05	-1.79051
Down	Ocln	1.89e-05	-0.587453
Down	Vat1l	2.01e-05	-1.47171
Down	Cpt2	2.01e-05	-0.762782
Up	Gm37773	2.07e-05	1.00706
Down	1700016K19Rik	2.13e-05	-1.2248
Down	Gjb1	2.13e-05	-0.653836
Down	Mal	2.17e-05	-0.585412
Down	Tns4	2.18e-05	-2.98264
Down	Tekt1	2.18e-05	-1.34298
Down	Fap	2.3e-05	-2.00936
Down	Rfx2	2.32e-05	-0.901143
Down	Hoatz	2.36e-05	-2.50471
Down	Gas2l2	2.68e-05	-1.08719
Down	Cfap126	2.83e-05	-1.65036
Down	Iqcg	2.96e-05	-0.902309
Down	Smim22	3.07e-05	-3.39524
Down	Ctsc	3.21e-05	-0.749653
Down	Catip	3.24e-05	-1.08102
Down	Rdh5	3.25e-05	-2.38663
Down	Casc1	3.25e-05	-0.97421
Down	Tns1	3.4e-05	-0.586607
Down	Rhpn2	3.63e-05	-0.587295
Down	Dsg2	3.86e-05	-0.881738
Down	Spata6	3.93e-05	-0.769866
Down	Armh1	4.05e-05	-1.69141
Down	Steap2	4.05e-05	-1.51845
Down	Fam161a	4.05e-05	-1.00882
Down	Ccdc146	4.12e-05	-1.73335
Down	Lgals3	4.35e-05	-1.40043
Down	Dnah2	4.41e-05	-0.756035
Down	Mdh1b	4.52e-05	-1.17632
Down	H1f2	4.96e-05	-0.64815
Down	Dnali1	5.01e-05	-1.7531
Down	Adgb	5.31e-05	-1.17094
Down	Slco1a5	5.42e-05	-2.68765
Down	Dmpk	5.42e-05	-0.647844
Down	Npr1	5.57e-05	-0.75074
Down	Dnah6	5.58e-05	-2.01782
Down	Lama5	5.68e-05	-0.79396
Down	Adamtsl4	5.87e-05	-0.721597
Down	Rgs22	5.91e-05	-1.38058
Down	Ttc21a	6.01e-05	-1.97849
Down	Gm14051	6.05e-05	-3.02621
Down	Nod1	6.56e-05	-0.626805
Down	Itpripl1	6.85e-05	-1.60841
Down	Flnc	6.89e-05	-0.720324
Down	Lrriq1	7.08e-05	-0.971315
Down	Thbs4	7.15e-05	-0.692584
Down	Ajuba	7.43e-05	-0.938312
Down	Mapk15	7.73e-05	-1.30083
Down	Ccdc121	7.73e-05	-1.13373
Down	Slc31a1	7.99e-05	-1.11025
Down	Ppp1r36	8.24e-05	-1.4923
Down	Nudt7	8.4e-05	-0.898925
Down	Spag8	8.45e-05	-1.08126
Down	Togaram2	8.63e-05	-1.00634
Down	Col27a1	8.63e-05	-0.782894
Down	Slco1c1	9.12e-05	-0.725773
Down	Fam216b	9.24e-05	-1.34845
Down	Efhc1	0.000102	-1.1372
Down	S1pr5	0.000102	-0.614689
Down	Msx1	0.000103	-1.67049
Down	Sema3b	0.000105	-2.25319
Down	Hspb6	0.000107	-0.869788
Down	Rilp	0.000109	-1.02924
Down	Tep1	0.000114	-0.606712
Down	Dmkn	0.000117	-1.68895
Down	Col6a3	0.000121	-1.74732
Down	Sspo	0.000124	-0.850076
Down	Ccdc40	0.000129	-1.04618
Down	Syngr2	0.000132	-0.590151
Down	Rs1	0.000133	-2.0286
Down	Antxr1	0.000133	-0.73636
Down	Tcaf2	0.000134	-1.41101
Down	Dynlt4	0.000138	-1.89936
Down	Gm11992	0.000147	-1.09764
Down	Bcam	0.000148	-0.767008
Down	Cnmd	0.000149	-1.42829
Down	Gm29538	0.000158	-3.07958
Down	Cfap70	0.00016	-0.999994
Up	Gm37928	0.00016	0.77239
Down	Crhr2	0.00017	-1.19172
Down	Galm	0.000179	-1.03536
Down	Lgals3bp	0.00018	-0.892511
Down	Spef2	0.000183	-0.973816
Down	Rgs3	0.000183	-0.633928
Down	Hspb8	0.000185	-0.731543
Down	Col18a1	0.000186	-0.923543
Down	Erbb3	0.000194	-0.73377
Down	Slc16a9	0.000198	-1.26159
Down	Gjc2	0.0002	-0.619657
Down	Septin10	0.000203	-0.734485
Down	Glb1l2	0.000211	-1.42383
Down	Tekt4	0.000214	-1.44002
Down	Trpm3	0.000214	-1.21991
Down	Tor4a	0.000214	-0.849806
Down	Rom1	0.000217	-0.607799
Down	Hdc	0.000224	-0.985905
Down	Dab2	0.000229	-1.03868
Down	Agbl2	0.000257	-1.2334
Down	Cdkn1c	0.000261	-1.72911
Down	E230013L22Rik	0.000262	-2.12484
Down	Nkx6-2	0.000269	-0.69431
Down	Id1	0.000273	-0.753583
Down	Galnt12	0.000296	-0.966408
Down	Postn	0.000311	-1.33872
Down	Gm44250	0.000317	-2.1447
Down	Crb2	0.000321	-0.863649
Down	Phactr2	0.00033	-0.639787
Down	Ppp1r32	0.000357	-1.19744
Down	Frrs1	0.000358	-0.934903
Down	Slc29a4	0.00036	-0.775488
Down	Gm16201	0.000363	-1.59493
Down	Iqca	0.000363	-1.19642
Down	Prom2	0.000376	-1.75359
Down	Cutal	0.000387	-1.74331
Down	Arhgef5	0.0004	-0.97635
Down	Cab39l	0.000409	-1.02008
Down	Atp11c	0.000417	-0.648672
Down	Car12	0.000426	-1.02712
Down	Fhad1	0.000426	-0.965071
Down	Ppp1r1b	0.000444	-1.13795
Down	Corin	0.000455	-2.17165
Down	Sap30bpos	0.000459	-1.26524
Down	Tent5c	0.000459	-1.03135
Down	Mxra8	0.000459	-0.874979
Down	Fzd7	0.000459	-0.626558
Down	Acox2	0.000462	-2.29541
Down	Loxl1	0.000464	-0.734391
Down	1700012B09Rik	0.000474	-1.69782
Down	Dmrt3	0.000474	-1.63753
Down	Zfp521	0.000489	-0.76346
Down	Tuba1c	0.000497	-0.84671
Down	Cox7a1	0.000511	-1.14869
Down	Smim5	0.000512	-1.46492
Down	Prima1	0.000516	-0.971894
Down	Nme9	0.000517	-1.4372
Down	Fam81b	0.000522	-2.48584
Down	Rab11fip1	0.00054	-0.831825
Down	Pcolce2	0.000544	-1.44324
Down	Paqr5	0.000544	-0.972074
Down	Ccdc81	0.000565	-1.27467
Down	Mapkapk3	0.000565	-0.8874
Down	Vwa3a	0.000565	-0.612288
Down	Bhmt	0.000617	-2.94402
Down	Cldn9	0.000632	-3.03803
Down	Lrrc46	0.000633	-1.12027
Down	Daw1	0.000639	-1.58836
Down	Plek2	0.000682	-2.15825
Down	Fam166c	0.000706	-2.03877
Down	Six5	0.000706	-0.647648
Down	Kif19a	0.000706	-0.617302
Down	Myo5c	0.00075	-1.03792
Down	Fam222a	0.00075	-0.729547
Down	1700024G13Rik	0.000762	-2.11956
Down	Igfbp2	0.000762	-1.53524
Down	Ifi27	0.000765	-0.650444
Down	St6galnac2	0.000783	-1.6164
Down	Clic1	0.000783	-0.613743
Down	Tcea3	0.000867	-1.72932
Down	Glp1r	0.000867	-1.57216
Down	Ace	0.000918	-1.91246
Down	Fzd4	0.000918	-0.635376
Down	Prcd	0.000941	-0.884736
Down	Fbln7	0.000966	-0.890565
Down	Cltrn	0.00098	-2.16867
Down	Lpin3	0.00099	-1.22076
Down	Col9a3	0.00108	-2.04861
Down	Elovl7	0.00109	-1.13854
Down	Parp4	0.00113	-0.670032
Down	Aox1	0.00115	-0.647023
Down	Pon3	0.00122	-1.77998
Down	Cfap73	0.00125	-1.50221
Down	Gm13807	0.00126	-1.87632
Down	Slc2a12	0.00132	-2.02449
Down	Pla2g5	0.00133	-2.25734
Down	Cxcl5	0.00136	-1.45081
Up	Gm43300	0.00141	0.947639
Down	Lbx2	0.00144	-1.96818
Down	Sntb1	0.0015	-0.601618
Down	Lca5l	0.00152	-0.610099
Down	Armc3	0.00157	-1.36935
Down	Ppp1r3b	0.00157	-1.17277
Down	Hspg2	0.00157	-0.809335
Down	Col4a5	0.00157	-0.793032
Down	Six3os1	0.00158	-3.10431
Down	Pcp4l1	0.00158	-0.912375
Down	Wnt8b	0.00165	-2.06503
Up	Gm44846	0.00165	0.81602
Down	Sostdc1	0.00168	-2.46424
Down	Ntf5	0.00168	-1.49408
Down	Capn6	0.0017	-1.1727
Down	Ackr4	0.00173	-1.36937
Down	Zic5	0.0018	-0.928693
Down	Sncg	0.00183	-0.900924
Down	Igsf5	0.00191	-1.74942
Down	Ooep	0.00194	-1.84961
Down	Ebf3	0.00194	-1.63788
Down	Lbp	0.002	-2.1992
Down	Zfp185	0.002	-0.907013
Down	Slc16a12	0.00205	-1.10651
Down	Gprc5c	0.00208	-0.852834
Down	D630024D03Rik	0.00211	-1.52195
Down	Ebf2	0.00218	-2.73733
Down	Cfap77	0.00218	-1.51338
Down	Fbxo36	0.00218	-0.721513
Down	Dnah11	0.0022	-1.83411
Down	Tsku	0.0022	-0.86346
Down	Inmt	0.00227	-0.980576
Down	Abca4	0.00229	-2.34396
Down	Esrrb	0.00235	-0.718155
Down	Rhod	0.00237	-1.26341
Down	Trpv4	0.00249	-2.44795
Down	H2-T-ps	0.00254	-1.51898
Down	Drc7	0.00255	-2.36794
Down	Cfap52	0.00258	-1.01207
Down	Slc28a3	0.00259	-2.05186
Down	Cgnl1	0.00259	-1.40889
Down	Sln	0.0026	-1.80075
Down	Dcdc5	0.00268	-1.37348
Down	Mansc4	0.00278	-1.2416
Down	Tnfaip8	0.0028	-0.594684
Down	Slc4a11	0.003	-1.13762
Down	Mak	0.00305	-0.756666
Down	Kl	0.00311	-2.03204
Down	1700013F07Rik	0.00315	-0.885041
Down	Large2	0.00328	-1.71823
Down	Kcnmb1	0.0033	-1.23038
Down	Myof	0.00345	-0.710789
Down	Nkx2-1	0.00346	-2.31739
Down	Mmp2	0.00367	-0.640278
Down	BC021767	0.00372	-1.6522
Down	Gm15587	0.00374	-1.19853
Down	Gulp1	0.0038	-0.844342
Down	Hapln2	0.0038	-0.600265
Down	Kcnj13	0.00381	-2.79704
Down	Cfap53	0.00381	-1.93571
Down	Cndp1	0.00381	-1.3706
Down	Cyp39a1	0.00381	-0.90019
Down	Tgif1	0.00385	-0.94214
Down	Dok1	0.00387	-0.656652
Down	Marveld3	0.00388	-1.38592
Up	Npcd	0.00388	0.969162
Down	Myb	0.00392	-1.19595
Down	1700088E04Rik	0.00399	-0.635258
Down	Zic4	0.00401	-2.02325
Down	Jhy	0.00402	-1.52612
Down	Ctnnal1	0.0042	-0.612342
Down	Hspb1	0.00456	-0.798244
Down	Spa17	0.00458	-0.725215
Down	Epn3	0.00459	-1.63824
Down	Gm44866	0.00459	-1.13887
Down	Slc14a2	0.0046	-1.2462
Down	Prdm12	0.00469	-3.48539
Down	Slc43a3	0.00475	-1.25789
Down	Ttc29	0.00499	-1.65202
Down	Pifo	0.00507	-1.69887
Down	Cnksr3	0.00518	-0.609023
Down	Apobec1	0.00522	-0.806195
Down	Col8a2	0.00536	-2.20308
Down	Il17re	0.0055	-1.23827
Down	Ccdc163	0.00553	-0.645496
Down	Ccdc89	0.00557	-1.11183
Down	Plin4	0.00569	-1.67454
Down	Cabcoco1	0.00581	-0.889386
Down	Deup1	0.00583	-1.40477
Down	Gm17552	0.00589	-0.80457
Down	Dnai3	0.00599	-2.30109
Down	Dnajb13	0.00608	-1.70716
Down	Otx2	0.00613	-2.70092
Down	Tmprss11a	0.00619	-2.88051
Down	Mamdc2	0.00619	-0.856131
Down	Cish	0.00619	-0.801662
Down	Pyroxd2	0.00619	-0.592039
Down	Cpn1	0.00633	-2.22037
Down	Slc16a8	0.00636	-2.1442
Down	Gm867	0.00645	-1.15415
Down	Tmem37	0.00653	-1.26819
Down	Capg	0.00663	-0.662717
Down	Nat8f3	0.00677	-0.712734
Down	Sulf1	0.00694	-1.91861
Down	Sox13	0.00695	-0.626838
Down	Morn3	0.00712	-1.42412
Down	4932438H23Rik	0.00715	-1.16257
Down	Slc39a4	0.00718	-2.37141
Down	Npffr1	0.00738	-0.653796
Down	Rps6-ps3	0.00738	-0.630787
Down	Enpp1	0.00745	-0.650465
Down	Wdr86	0.00753	-2.93614
Down	Zic2	0.00754	-1.19579
Down	Klc3	0.00754	-0.709416
Down	Rec8	0.00756	-0.861581
Down	Ttf2	0.00759	-0.605348
Down	Fbxl13	0.00769	-1.2846
Down	Zic1	0.0077	-2.1337
Down	Krt8	0.00773	-2.62474
Down	Rassf9	0.00775	-1.01084
Down	Ak9	0.00783	-1.3665
Down	Lhb	0.00797	-1.97814
Down	Slc24a5	0.00797	-0.713838
Down	Spag17	0.00806	-1.07853
Down	Ano1	0.0083	-1.06749
Down	Mdfic	0.00844	-1.48938
Down	Lrrc71	0.00844	-1.18477
Down	Asb4	0.00848	-2.18715
Down	Clic6	0.00861	-2.81131
Down	Ly6g6f	0.00865	-1.11136
Down	Ifnlr1	0.00887	-1.51749
Down	Slc6a19	0.00896	-1.34331
Up	Gm44559	0.00907	1.19567
Down	Fzd5	0.00921	-0.765011
Down	Plpp2	0.00955	-0.658643
Down	Lum	0.00959	-0.621757
Down	Rbm47	0.00963	-1.93434
Down	Gmnc	0.00986	-0.729911
Down	Wdr38	0.0099	-1.09081
Down	Pcolce	0.0101	-1.67124
Down	Ctf1	0.0102	-0.767559
Down	Atoh8	0.0102	-0.72257
Down	4930511M06Rik	0.0104	-1.78954
Down	Ccdc33	0.0104	-1.17624
Down	Slc12a7	0.0104	-0.662369
Down	Olfr1507	0.0106	-2.40579
Down	Col8a1	0.0108	-2.5067
Down	Ggt1	0.0108	-0.758193
Down	Qrfprl	0.0109	-2.07041
Down	Angptl2	0.0109	-1.54028
Down	Wfdc2	0.011	-2.89894
Down	Enpp2	0.0111	-2.38706
Down	Wdr93	0.0114	-1.57014
Down	Ecrg4	0.0116	-2.6476
Down	Heg1	0.0117	-0.6293
Down	Cldn19	0.0121	-1.04772
Down	Ankub1	0.0121	-0.631671
Down	Cfap46	0.0121	-0.594221
Up	Nnmt	0.0121	0.88361
Down	Spint1	0.0125	-0.618538
Down	Cspg4b	0.0126	-1.28634
Down	Col9a1	0.0126	-1.18228
Down	Sema3f	0.0128	-0.634996
Down	Dydc2	0.0133	-1.38876
Down	C1s1	0.0138	-1.02285
Down	Lrp2	0.0138	-0.755285
Down	Lrrc9	0.014	-0.895146
Down	Col4a6	0.0142	-1.08194
Down	Tc2n	0.0143	-1.74805
Down	Ccdc60	0.0147	-0.959045
Down	Cpxm2	0.0147	-0.953041
Down	Fam166b	0.0147	-0.828345
Down	Cngb1	0.015	-1.53666
Up	Calca	0.015	1.07894
Down	Calml4	0.0152	-2.47347
Down	Spsb2	0.0152	-0.618766
Down	1700003D09Rik	0.0153	-1.24205
Down	Prlr	0.0157	-2.2734
Down	Traf1	0.0157	-1.15163
Down	Spn	0.016	-1.34025
Down	Gm20661	0.016	-1.03061
Down	Oca2	0.0163	-2.44344
Down	Bst2	0.0164	-0.834685
Down	Crb3	0.0165	-1.2066
Down	Ptpn18	0.0165	-0.696097
Down	Zfp982	0.0166	-0.768763
Down	Wfikkn2	0.0168	-2.09527
Up	Gm44164	0.0169	0.737439
Down	Clic3	0.0177	-0.788967
Down	Cldn2	0.0178	-2.81734
Down	Spata18	0.0178	-1.93324
Down	Acp5	0.0178	-1.35075
Down	Kcne2	0.018	-2.98344
Down	Smad6	0.018	-0.815677
Down	Trim21	0.0181	-0.585178
Up	Gm16287	0.0184	0.959384
Down	Lmx1a	0.0185	-2.31607
Down	Efhb	0.0188	-1.54449
Down	Wdr72	0.0192	-2.31892
Down	Ngfr	0.0197	-1.51064
Down	Pld5	0.0197	-1.49977
Down	Got1l1	0.0197	-1.17216
Down	Ankfn1	0.02	-1.39418
Down	Loxl4	0.02	-1.29176
Down	Defb11	0.0202	-2.03766
Down	Tnni3	0.0202	-1.1664
Down	Ripk4	0.0202	-1.04755
Down	Gnmt	0.0206	-1.05597
Down	Six3	0.0207	-3.01077
Down	Hck	0.021	-0.621934
Down	Mia	0.0216	-1.32477
Down	Il17rb	0.022	-0.605654
Down	Zfp474	0.0221	-1.4069
Up	Pcdha8	0.0221	0.978793
Down	Spata17	0.0227	-0.923686
Down	Krt18	0.023	-2.4705
Down	Cmtm8	0.023	-0.844711
Down	Dmrtb1	0.0232	-1.50243
Up	Galnt15	0.0234	0.620334
Down	Lepr	0.0237	-1.55534
Up	Gm44562	0.0237	0.879655
Up	Gm5441	0.0238	0.657368
Down	Nt5dc1	0.024	-0.647214
Down	Sfrp5	0.0241	-1.87503
Down	Stoml3	0.0243	-1.1571
Down	Enkur	0.0244	-0.775243
Down	Adgrd1	0.0247	-0.836247
Down	Ifi35	0.0247	-0.625298
Down	Lrrc51	0.0255	-0.613074
Down	H2bc6	0.0256	-0.597101
Down	Gm28729	0.0261	-2.06338
Down	Gm32468	0.0261	-1.9875
Down	Lrrc34	0.0261	-1.78465
Down	Tmem184a	0.0267	-1.63667
Down	Adora2a	0.0274	-2.21183
Down	Tec	0.0274	-0.59323
Up	Lefty2	0.0274	0.648255
Up	Gm36989	0.0274	1.04486
Down	Rassf7	0.0276	-0.858328
Down	Sfrp1	0.0282	-1.08814
Down	Tekt2	0.0283	-1.06387
Down	Vamp5	0.0283	-0.598273
Up	Gm44033	0.0291	1.0032
Down	Ttll9	0.0296	-0.761989
Down	Cox8b	0.0297	-2.00888
Down	Kctd11	0.0302	-0.591489
Down	Gstt3	0.0315	-0.647508
Down	Folr1	0.0316	-2.76871
Down	St14	0.0317	-0.916319
Down	Mfrp	0.032	-2.75529
Down	H2-Eb1	0.0325	-1.0033
Down	Dmgdh	0.0326	-0.938626
Down	Anxa8	0.033	-0.836184
Down	Nhlrc4	0.0336	-1.3695
Up	Trpv6	0.0339	0.609233
Up	Vegfd	0.0342	0.630893
Down	Ggt5	0.0349	-0.630813
Up	Gm26871	0.035	0.620764
Down	Cd63-ps	0.0354	-0.786327
Down	Uox	0.036	-1.11249
Down	Bmp6	0.0361	-1.19591
Down	Tlr2	0.0365	-0.769135
Down	Frmpd1os	0.0366	-2.45137
Down	Tmem52	0.0378	-1.10856
Down	Loxl2	0.0381	-1.20077
Down	1700028P14Rik	0.0395	-0.671756
Down	Steap1	0.0398	-2.61628
Down	Sbspon	0.0398	-1.10127
Down	Gm16576	0.0404	-0.741194
Down	Rsph14	0.0406	-1.08794
Down	Mrap2	0.0406	-0.696454
Down	Lrguk	0.041	-0.622596
Down	Sh3bgr	0.0435	-0.695227
Down	Gm16299	0.044	-0.829197
Down	Cyp27a1	0.044	-0.610965
Down	Dct	0.0445	-1.19228
Down	H4c8	0.0445	-0.753449
Down	C130074G19Rik	0.0447	-0.79191
Down	Ttr	0.0456	-2.89516
Down	Spag16	0.0456	-1.84271
Down	2610035F20Rik	0.0457	-1.39481
Down	Avpr1a	0.0459	-1.54433
Up	1700056N10Rik	0.0459	0.627367
Down	Klk6	0.0462	-1.36133
Down	D630039A03Rik	0.0462	-1.1597
Down	Pon1	0.0473	-2.37786
Down	Krt23	0.0476	-1.42035
Down	Hyal3	0.0484	-1.07276
Down	Aqp1	0.0494	-2.64981
Down	Cyp2j12	0.0495	-0.599918
Down	Sh3tc2	0.0495	-0.586676
